# Supplementary material for: Bis(phenanthroline)-ethylenediamine conjugate displays excimer fluorescence upon binding with DNAElectronic supplementary information (ESI) available: synthetic procedures and analytical data, binding isotherms, and fluorescence titration by addition of 1 to calf thymus DNA. See http://www.rsc.org/suppdata/cc/b3/b316126a/
Source: Royal Society of Chemistry journal article supplement (doi:10.1039/b316126a), 2004-01-01
Supplement: b316126a.doc [file b316126a.doc]

Supporting information for “Bis(phenanthroline)-ethylenediamine Conjugate Displays Excimer Fluorescence upon Binding with DNA”

***Synthetic procedure and analytical data of 1***

***N*,*N'*-Bis(1,10-Phenanthrolin-2-yl)ethylenediamine (1)**: 2-Chloro-1,10-phenanthroline (1.554 g, 7.240 mmol) and ethylenediamine (0.168 g, 2.80 mmol) in DBU (1.102 g, 7.240 mmol) were stirred at 90 °C for 18h. After the reaction mixture was dissolved in CH2Cl2, the solution was washed with saturated NaHCO3. The solvent was removed *in vacuo* and the residue was purified by column chromatography (CH2Cl2/MeOH, 98:2) on NH-silica gel to afford the product as yellow powder (0.883 g, 76%). *N*,*N'*-Bis(1,10-Phenanthrolin-2-yl)ethylenediamine (0.080 g, 0.192 mmol) in 8 M HCl (3 ml) was stirred at room temperature, and solvent was removed *in vacuo*. The residue was washed with CH2Cl2 and recrystallized from EtOH/H2O to afford the product as yellow powder (0.101 g, 89%). 1H NMR (CDCl3):  = 4.05 (s, 4H, C*H*2), 6.55 (br, 2H, N*H*), 6.99 (d, *J*=9.0 Hz, 2H, 3-H), 7.48 (d, *J*=8.4 Hz, 2H, 5-H), 7.55 (dd, *J*=8.1, 3.9 Hz, 2H, 8-H), 7.62 (d, *J*=8.4 Hz, 2H, 6-H), 7.87 (d, *J*=9.0 Hz, 2H, 4-H) 8.19 (dd, *J*=8.1, 1.8 Hz, 2H, 7-H), 9.15 (dd, *J*=3.9, 1.8 Hz, 2H, 9-H). ESI-MS: m/z, 417 [M+H]+, 209 [M+2H]2+. Anal. Calcd. for C26H20N6(+4HCl+1.5H2O): C 52.99, H 4.62, N 14.26; found C 52.92, H 4.48, N 14.29. UV [in 10 mM Tis-HCl (pH 7.0)]:max, 223 nm (, 61,100), 291 nm (, 37,000).

***Synthetic procedure and analytical data of 2***

***N*3-BOC-*N*1,*N*5-Bis(trifluoroacetyl)diethylenetriamine**: *N*1,*N*5-Bis(trifluoroacetyl)diethylenetriamine trifluoroacetate salt (1.00 g, 2.44 mmol) and (BOC)2O (0.9 ml, 3.7 mmol) were dissolved in dry CH3CN (10 ml). Dry triethylamine (0.5 ml, 3.7 mmol) was then added to the solution and the reaction mixture was stirred at room temperature for 16h. The solvent was removed *in vacuo* and the residue was dissolved in EtOAc. The solution was washed with H2O, dried over Na2SO4, and concentrated *in vacuo* (0.872 g, 90%). 1H NMR (CDCl3)  = 1.46 (s, 9H, tBu), 3.50 (br, 8H, C*H*2), 7.70 (br, 2H, N*H*).

***N*3-BOC-diethylenetriamine**: *N*3-BOC-*N*1,*N*5-Bis(trifluoroacetyl)diethylenetriamine (0.872 g, 2.21 mmol) was dissolved in MeOH (20 ml) and H2O (2 ml). Potassium carbonate (1.220 g, 8.82 mmol) was then added. After the reaction mixture was refluxed for 1h, the solvent was removed *in vacuo*. The residue was purified by column chromatography (CH2Cl2/MeOH, 9:1) on NH silica gel to afford the product as yellow oil (0.242 g, 54%). 1H NMR (CDCl3)  = 1.46 (s, 9H, tBu), 1.67 (s, 4H, NH2), 2.86 (t, *J*=6.5 Hz, 4H, C*H*2NH2), 3.30 (t, *J*=6.5 Hz, NC*H*2).

***N*1,*N*5-Bis(1,10-phenanthrolin-2-yl)diethylenetriamine (2)**: 2-Chloro-1,10-phenanthroline (0.480 g, 2.24 mmol) and *N*3-BOC-diethylenetriamine (0.182 g, 0.895 mmol) in DBU (0.341 g, 2.238 mmol) were stirred at 90℃ for 44 h. After the reaction mixture was dissolved in CH2Cl2, the solution was washed with H2O. The solvent was removed *in vacuo* and the residue was purified by column chromatography (CH2Cl2/MeOH, 95:5) on NH silica gel to afford *N*3-BOC-*N*1,*N*5-bis(1,10-phenanthrolin-2-yl)diethylenetriamine as yellow powder (0.214 g, 43%).

The *N*3-BOC protected product (0.237 g, 0.423 mmol) was dissolved in 5M HCl (10 ml). The solution was stirred at room temperature for 22 h. The solvent was removed *in vacuo*, the residue was washed with CH2Cl2, purified by recrystallization from EtOH/H2O to afford the product as crystalline brown solid (0.238 g, 88%). 1H NMR(D2O)  = 3.52 (br, 4H, NHC*H*2), 3.98 (br, 4H, C*H*2NHPhen), 6.80 (br, 2H, 3-H), 7.36 (m, 6H, 5-, 6- , and 8-H), 8.02 (br, 2H, 4-H), 8.63 (br, 2H, 7-H), 8.85 (br, 2H, 9-H). ESI MS: m/z, 460 [M+H]+, 179 [M+5H+2Cl]3+, 154 [M+3H]3+. Anal. Calcd. for C28H25N7(+3HCl+3H2O) C 53.98, H 5.50, N 15.74; found C 54.09, H 5.28, N 15.94. UV [in 10 mM Tis-HCl (pH 7.0)]: max, 226 nm (, 45,300), 289 nm (, 28,500).

**Fig. S1**. Binding Isotherms for the interaction of **1** and **2** with calf thymus DNA obtained by fluorescence titration as described in Figure 1. The lines are the best fit to the Mcghee-von Hippel equation.

**Fig.　S2** 　Fluorescence spectral titration by addition of 1 to calf thymus DNA Expeimental procedure is similar to Figure1. Conc. of DNA, 100 M; Conc. of **1**, 10, 20, 30, 40, and 50 M.
